# Supplementary material for: Metabolomics Insights into the Differential Response of Breast Cancer Cells to the Phenolic Compounds Hydroxytyrosol and Luteolin
Source: MDPI journal article supplement (doi:10.3390/molecules28093886), 2023-05-04
Supplement: s1 [file s1]

## Supplementary Material

# Metabolomics Insights into the Differential Response of Breast Cancer Cells to the Phenolic Compounds Hydroxytyrosol and Luteolin

Maite Garcia-Guasch <sup>1</sup>, Eduard Escrich <sup>1</sup>, Raquel Moral <sup>1,\*</sup> and Iola F. Duarte <sup>2,\*</sup>

<sup>1</sup> Physiology Unit, Department of Cell Biology, Physiology and Immunology, Faculty of Medicine, Universitat Autònoma de Barcelona, 08193 Barcelona, Spain; mariateresa.garcia.guasch@uab.cat (M.G.-G.); eduard.escrich@uab.cat (E.E.)

<sup>2</sup> CICECO—Aveiro Institute of Materials, Department of Chemistry, University of Aveiro, Campus de Santiago, 3810-193 Aveiro, Portugal

\* Correspondence: raquel.moral@uab.cat (R.M.); ioladuarte@ua.pt (I.F.D.)

## Figures

**Figure S1.** Heatmaps illustrating the levels of (A) intracellular polar metabolites and (B) lipids in MDA-MB-231 and in MCF-7 cells.

**Figure S2.** Multivariate analysis of the spectral profiles from MDA-MB-231 cells polar extracts.

**Figure S3.** Multivariate analysis of the spectral profiles from MCF-7 cells polar extracts.

## Tables

**Table S1.** Metabolite variations in the culture medium of MDA-MB-231 cells treated with HT or LUT, in relation to untreated controls.

**Table S2.** Metabolite variations in the culture medium of MCF-7 cells treated with HT or LUT, in relation to untreated controls.

**Table S3.** Metabolite variations in the polar extracts of MDA-MB-231 cells treated with HT or LUT, in relation to untreated controls.

**Table S4.** Metabolite variations in the polar extracts of MCF-7 cells treated with HT or LUT, in relation to untreated controls.

**Figure S1.** Heatmaps illustrating the levels of (A) intracellular polar metabolites and (B) lipids in MDA-MB-231 and in MCF-7 cells. Signal integrals were normalized to total area, mean-centered and scaled to Unit Variance.

**A**

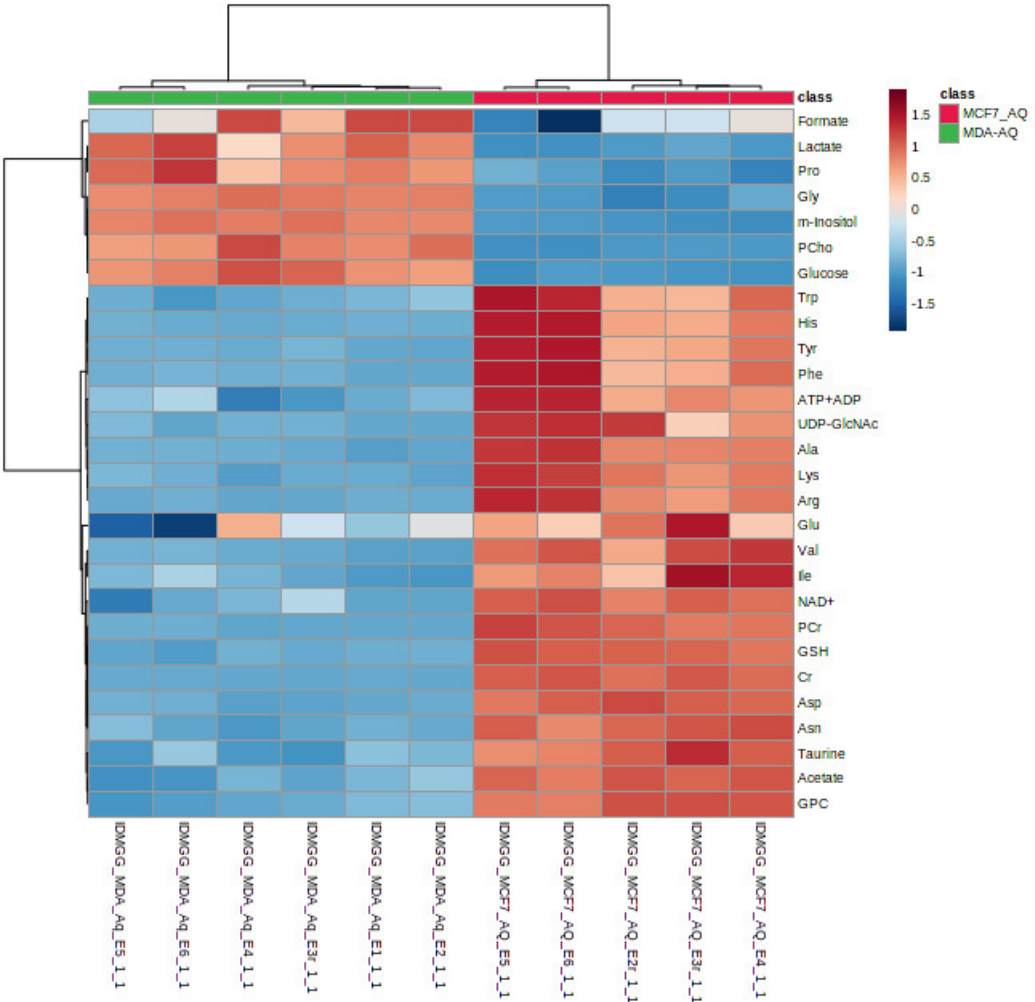

**B**

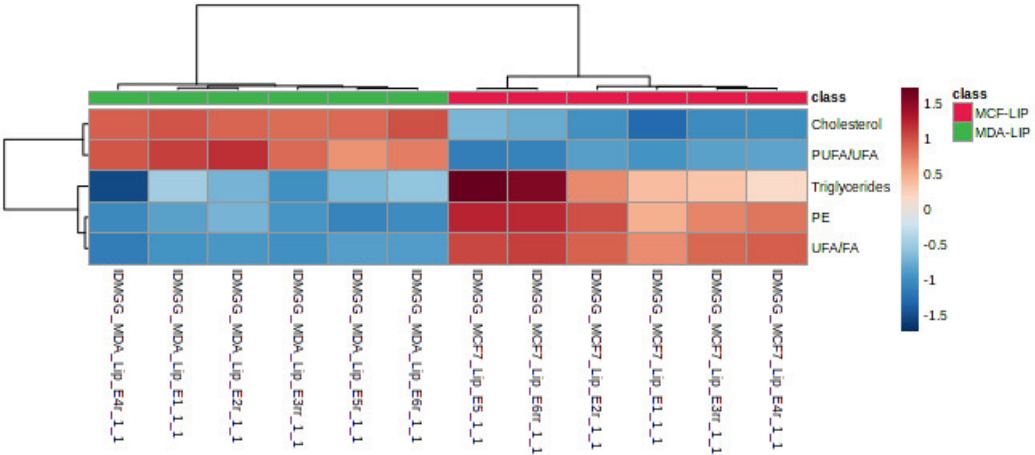

**Figure S2.** Multivariate analysis of the spectral profiles from MDA-MB-231 cells polar extracts. **(A)** and **(C)** Scores scatter plots obtained by PCA (left) and PLS-DA (right) of cells treated with HT and LUT, respectively. **(B)** and **(D)** PLS-DA LV1 loadings plots colored according to variable importance to the projection (VIP), showing discriminant features for HT- and LUT-treated cells, respectively. Three-letter codes used for amino acids; ATP/ADP, adenosine tri/di-phosphate; BCAA, branched-chain amino acids; Cr, creatine; GPC, glycerophosphocholine; GSH, reduced glutathione; m-Ino, myo-inositol.

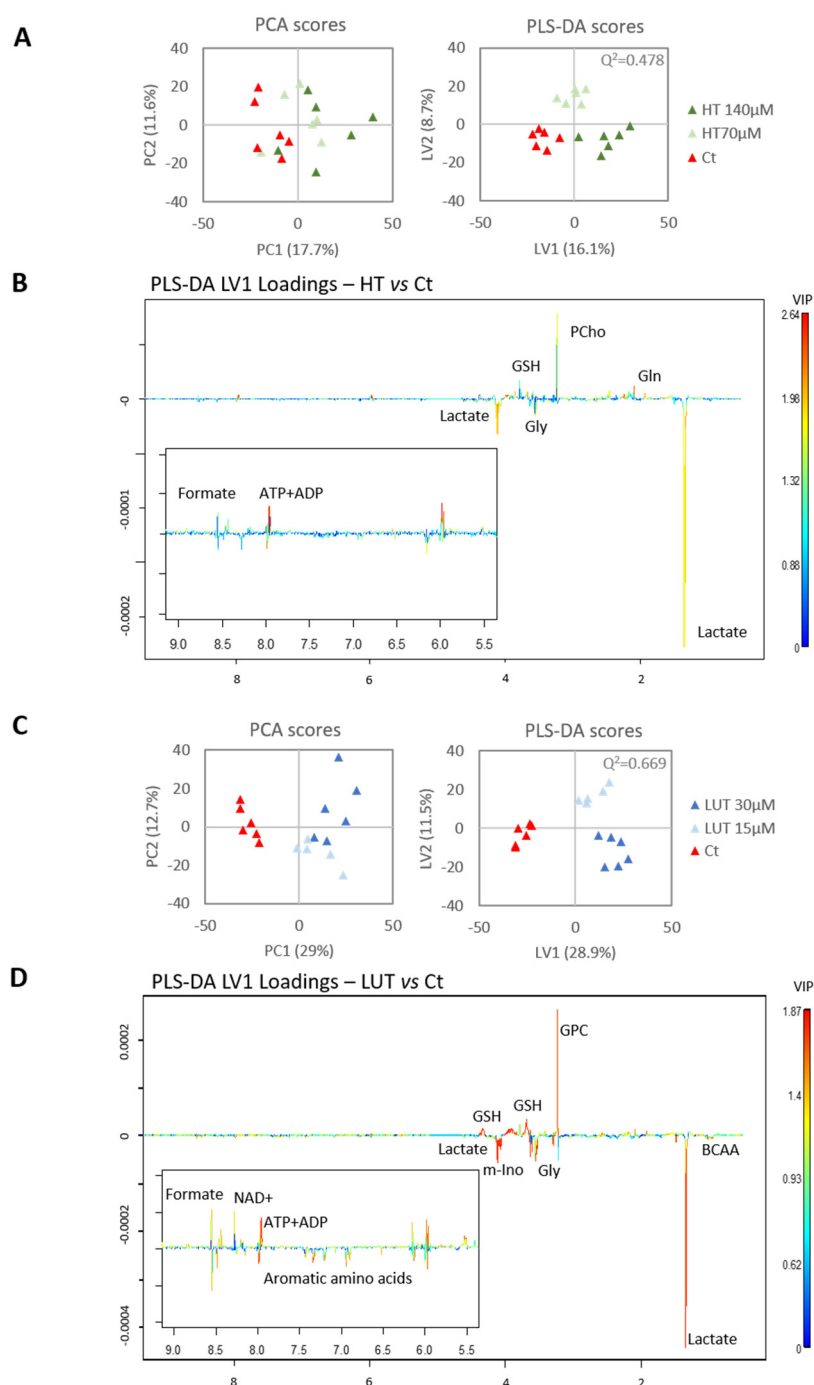

**Figure S3.** Multivariate analysis of the spectral profiles from MCF-7 cells polar extracts. **(A)** and **(C)** Scores scatter plots obtained by PCA (left) and PLS-DA (right) of cells treated with HT and LUT, respectively. **(B)** and **(D)** PLS-DA LV1 loadings plots colored according to variable importance to the projection (VIP), showing discriminant features for HT- and LUT-treated cells, respectively. Three-letter codes used for amino acids; ATP/ADP, adenosine tri/di-phosphate; BCAA, branched-chain amino acids; GSH, reduced glutathione; m-Ino, myo-inositol; NAD<sup>+</sup>, nicotinamide adenine dinucleotide; PCho, phosphocholine.

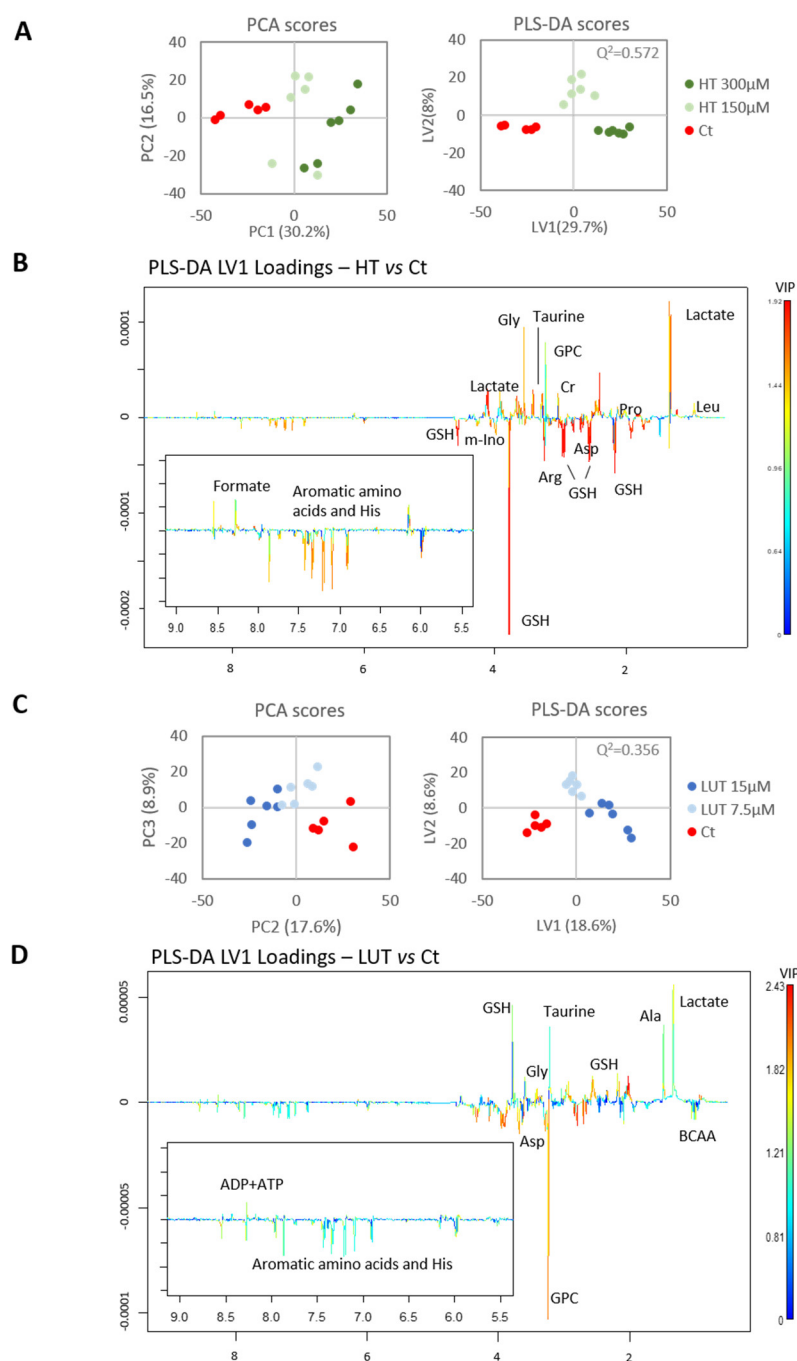

**Table S1.** Metabolite variations in the culture medium of MDA-MB-231 cells treated with HT or LUT, in relation to untreated controls. The values of % variation are those used to color-code the heatmap shown in Figure 2B.

|                 |         | HT 70 $\mu$ M         | HT 140 $\mu$ M        | LUT 15 $\mu$ M        | LUT 30 $\mu$ M        |
|-----------------|---------|-----------------------|-----------------------|-----------------------|-----------------------|
| <b>Acetate</b>  | % Var   | 0                     | 17.74                 | 16.45                 | 44.35                 |
|                 | $\pm$   |                       | 4.57                  | 3.93                  | 4.03                  |
|                 | ES      |                       | 2.04                  | 2.21                  | 4.96                  |
|                 | p-value |                       | $7.90 \times 10^{-3}$ | $9.72 \times 10^{-3}$ | $1.81 \times 10^{-5}$ |
| <b>Ala</b>      | % Var   |                       | -8.87                 | -9.78                 | -6.23                 |
|                 | $\pm$   |                       | 3.34                  | 2.92                  | 3.25                  |
|                 | ES      |                       | -1.59                 | -2.01                 | -1.12                 |
|                 | p-value |                       | $2.50 \times 10^{-2}$ | $1.30 \times 10^{-2}$ | $8.26 \times 10^{-2}$ |
| <b>Formate</b>  | % Var   | 54.17                 | 93.33                 | 31.67                 | 27.78                 |
|                 | $\pm$   | 3.42                  | 6.33                  | 7.68                  | 3.33                  |
|                 | ES      | 6.51                  | 5.75                  | 2.03                  | 3.96                  |
|                 | p-value | $8.96 \times 10^{-7}$ | $2.36 \times 10^{-4}$ | $1.76 \times 10^{-2}$ | $4.88 \times 10^{-5}$ |
| <b>Gln</b>      | % Var   | 0                     | 0                     | 7.77                  | 14.10                 |
|                 | $\pm$   |                       |                       | 3.11                  | 2.94                  |
|                 | ES      |                       |                       | 1.37                  | 2.45                  |
|                 | p-value |                       |                       | $4.29 \times 10^{-2}$ | $1.67 \times 10^{-3}$ |
| <b>Glu</b>      | % Var   | 0                     | 0                     | 20.18                 | 0                     |
|                 | $\pm$   |                       |                       | 4.60                  |                       |
|                 | ES      |                       |                       | 2.28                  |                       |
|                 | p-value |                       |                       | $9.04 \times 10^{-3}$ |                       |
| <b>Glucose</b>  | % Var   | 8.65                  | 10.10                 | 23.46                 | 30.59                 |
|                 | $\pm$   | 5.40                  | 4.34                  | 3.88                  | 4.24                  |
|                 | ES      | 0.85                  | 1.26                  | 3.09                  | 3.57                  |
|                 | p-value | $1.63 \times 10^{-1}$ | $7.60 \times 10^{-2}$ | $4.56 \times 10^{-3}$ | $5.56 \times 10^{-4}$ |
| <b>Gly</b>      | % Var   | 11.04                 | 10.58                 | 20.82                 | 23.01                 |
|                 | $\pm$   | 1.58                  | 1.65                  | 1.89                  | 1.62                  |
|                 | ES      | 3.90                  | 3.47                  | 5.72                  | 7.24                  |
|                 | p-value | $8.96 \times 10^{-4}$ | $8.94 \times 10^{-4}$ | $9.10 \times 10^{-6}$ | $5.03 \times 10^{-6}$ |
| <b>Glycerol</b> | % Var   | 9.62                  | 13.59                 | -12.05                | -26.50                |
|                 | $\pm$   | 5.06                  | 5.36                  | 4.45                  | 4.80                  |
|                 | ES      | 0.99                  | 1.36                  | -1.64                 | -3.79                 |
|                 | p-value | $1.05 \times 10^{-1}$ | $4.58 \times 10^{-2}$ | $2.81 \times 10^{-2}$ | $7.86 \times 10^{-4}$ |
| <b>Ile</b>      | % Var   | 0                     | 0                     | 0                     | 0                     |
|                 | $\pm$   |                       |                       |                       |                       |
|                 | ES      |                       |                       |                       |                       |
|                 | p-value |                       |                       |                       |                       |
| <b>KIC</b>      | % Var   | 16.67                 | 0                     | 32.38                 | 23.02                 |
|                 | $\pm$   | 5.99                  |                       | 5.25                  | 6.73                  |
|                 | ES      | 1.46                  |                       | 3.03                  | 1.67                  |
|                 | p-value | $3.71 \times 10^{-2}$ |                       | $1.85 \times 10^{-3}$ | $1.43 \times 10^{-2}$ |

|                 |         | HT 70μM               | HT 140μM              | LUT 15μM              | LUT 30μM              |
|-----------------|---------|-----------------------|-----------------------|-----------------------|-----------------------|
| <b>KIV</b>      | % Var   | 15.50                 | 16.96                 | 13.45                 | 0                     |
|                 | ±       | 7.84                  | 8.63                  | 7.29                  |                       |
|                 | ES      | 1.07                  | 1.04                  | 0.99                  |                       |
|                 | p-value | 1.18x10 <sup>-1</sup> | 1.11x10 <sup>-1</sup> | 1.52x10 <sup>-1</sup> |                       |
| <b>KMV</b>      | % Var   | 8.53                  | 8.87                  | 14.11                 | 0                     |
|                 | ±       | 5.34                  | 5.13                  | 4.77                  |                       |
|                 | ES      | 0.89                  | 0.95                  | 1.58                  |                       |
|                 | p-value | 1.75x10 <sup>-1</sup> | 1.53x10 <sup>-1</sup> | 4.19x10 <sup>-2</sup> |                       |
| <b>Lactate</b>  | % Var   | 11.99                 | 12.42                 | -7.96                 | -6.39                 |
|                 | ±       | 2.76                  | 2.91                  | 4.86                  | 3.36                  |
|                 | ES      | 2.28                  | 2.30                  | -0.97                 | -1.08                 |
|                 | p-value | 3.32x10 <sup>-3</sup> | 3.87x10 <sup>-3</sup> | 1.37x10 <sup>-1</sup> | 8.04x10 <sup>-2</sup> |
| <b>Leu</b>      | % Var   | 0                     | 0                     | 6.97                  | 7.50                  |
|                 | ±       |                       |                       | 1.63                  | 1.52                  |
|                 | ES      |                       |                       | 2.36                  | 2.46                  |
|                 | p-value |                       |                       | 6.45x10 <sup>-3</sup> | 1.76x10 <sup>-3</sup> |
| <b>Lys</b>      | % Var   | 0                     | 0                     | 6.16                  | 7.60                  |
|                 | ±       |                       |                       | 2.68                  | 2.13                  |
|                 | ES      |                       | -0.66                 | 1.27                  | 1.85                  |
|                 | p-value |                       |                       | 6.34x10 <sup>-2</sup> | 7.55x10 <sup>-3</sup> |
| <b>Met</b>      | % Var   | 0                     | 0                     | 11.91                 | 15.52                 |
|                 | ±       |                       |                       | 1.99                  | 1.66                  |
|                 | ES      |                       |                       | 3.23                  | 4.90                  |
|                 | p-value |                       |                       | 4.78x10 <sup>-4</sup> | 3.66x10 <sup>-5</sup> |
| <b>Pyruvate</b> | % Var   | 0                     | 0                     | 0                     | 0                     |
|                 | ±       |                       |                       |                       |                       |
|                 | ES      |                       |                       |                       |                       |
|                 | p-value |                       |                       |                       |                       |
| <b>Ser</b>      | % Var   | 11.11                 | 18.18                 | 36.80                 | 44.30                 |
|                 | ±       | 4.17                  | 2.81                  | 3.21                  | 3.21                  |
|                 | ES      | 1.35                  | 3.39                  | 5.53                  | 6.12                  |
|                 | p-value | 3.34x10 <sup>-2</sup> | 1.72x10 <sup>-3</sup> | 1.21x10 <sup>-5</sup> | 1.72x10 <sup>-6</sup> |
| <b>Val</b>      | % Var   | 0                     | 0                     | 8.13                  | 8.30                  |
|                 | ±       |                       |                       | 1.71                  | 1.55                  |
|                 | ES      |                       |                       | 2.61                  | 2.71                  |
|                 | p-value |                       |                       | 3.19x10 <sup>-3</sup> | 7.83x10 <sup>-4</sup> |

**Table S2.** Metabolite variations in the culture medium of MCF-7 cells treated with HT or LUT, in relation to untreated controls. The values of % variation are those used to color-code the heatmap shown in Figure 2D.

|                |         | HT 150μM              | HT 300μM              | LUT 7.5μM             | LUT 15μM              |
|----------------|---------|-----------------------|-----------------------|-----------------------|-----------------------|
| <b>Acetate</b> | % Var   | 90.64                 | 261.10                | -5.20                 | 13.88                 |
|                | ±       | 6.66                  | 9.22                  | 4.42                  | 6.61                  |
|                | ES      | 4.99                  | 7.89                  | -0.64                 | 1.05                  |
|                | p-value | 6.59x10 <sup>-5</sup> | 1.49x10 <sup>-4</sup> | 2.56x10 <sup>-1</sup> | 8.76x10 <sup>-2</sup> |
| <b>Ala</b>     | % Var   | 30.97                 | 19.88                 | 11.59                 | 6.48                  |
|                | ±       | 4.14                  | 2.51                  | 2.85                  | 3.41                  |
|                | ES      | 3.45                  | 4.25                  | 2.05                  | 0.98                  |
|                | p-value | 8.15x10 <sup>-4</sup> | 3.94x10 <sup>-4</sup> | 6.70x10 <sup>-3</sup> | 1.13x10 <sup>-1</sup> |
| <b>Formate</b> | % Var   | 52.61                 | 87.11                 | 0                     | 0                     |
|                | ±       | 10.89                 | 9.40                  |                       |                       |
|                | ES      | 2.04                  | 3.50                  |                       |                       |
|                | p-value | 3.84x10 <sup>-3</sup> | 1.40x10 <sup>-4</sup> |                       |                       |
| <b>Gln</b>     | % Var   | 19.63                 | 96.26                 | -36.60                | -32.09                |
|                | ±       | 12.88                 | 10.94                 | 21.20                 | 22.94                 |
|                | ES      | 0.74                  | 3.22                  | -1.13                 | -0.89                 |
|                | p-value | 2.12x10 <sup>-1</sup> | 2.61x10 <sup>-4</sup> | 6.15x10 <sup>-2</sup> | 1.27x10 <sup>-1</sup> |
| <b>Glu</b>     | % Var   | 13.67                 | 11.60                 | 11.04                 | 10.64                 |
|                | ±       | 4.05                  | 4.40                  | 3.69                  | 4.42                  |
|                | ES      | 1.69                  | 1.38                  | 1.51                  | 1.22                  |
|                | p-value | 1.03x10 <sup>-2</sup> | 3.41x10 <sup>-2</sup> | 1.99x10 <sup>-2</sup> | 4.55x10 <sup>-2</sup> |
| <b>Glucose</b> | % Var   | -73.04                | -46.62                | -55.30                | -52.39                |
|                | ±       | 17.85                 | 16.07                 | 17.83                 | 17.18                 |
|                | ES      | -3.43                 | -1.91                 | -2.28                 | -2.20                 |
|                | p-value | 1.14x10 <sup>-3</sup> | 7.07x10 <sup>-3</sup> | 2.72x10 <sup>-3</sup> | 3.69x10 <sup>-3</sup> |
| <b>Gly</b>     | % Var   | 102.22                | 217.33                | 0                     | 0                     |
|                | ±       | 33.15                 | 11.00                 |                       |                       |
|                | ES      | 1.09                  | 5.19                  |                       |                       |
|                | p-value | 8.28x10 <sup>-2</sup> | 1.16x10 <sup>-5</sup> |                       |                       |
| <b>His</b>     | % Var   | 0                     | -13.22                | 0                     | 0                     |
|                | ±       |                       | 2.97                  |                       |                       |
|                | ES      |                       | -2.64                 |                       |                       |
|                | p-value |                       | 1.26x10 <sup>-3</sup> |                       |                       |
| <b>Ile</b>     | % Var   | 24.29                 | 41.67                 | 0                     | 0                     |
|                | ±       | 8.83                  | 9.02                  |                       |                       |
|                | ES      | 1.31                  | 2.04                  |                       |                       |
|                | p-value | 4.61x10 <sup>-2</sup> | 4.67x10 <sup>-3</sup> |                       |                       |
| <b>KIC</b>     | % Var   | 0                     | 0                     | 0                     | 0                     |
|                | ±       |                       |                       |                       |                       |
|                | ES      |                       |                       |                       |                       |
|                | p-value |                       |                       |                       |                       |

|                 |         | HT 150μM              | HT 300μM              | LUT 7.5μM             | LUT 15μM              |
|-----------------|---------|-----------------------|-----------------------|-----------------------|-----------------------|
| <b>KIV</b>      | % Var   | -18.41                | -37.76                | 0                     | 0                     |
|                 | ±       | 11.30                 | 12.50                 |                       |                       |
|                 | ES      | -0.96                 | -1.87                 |                       |                       |
|                 | p-value | 1.20x10 <sup>-1</sup> | 9.19x10 <sup>-3</sup> |                       |                       |
| <b>KMV</b>      | % Var   | -13.43                | -21.81                | 0                     | 0                     |
|                 | ±       | 7.73                  | 8.04                  |                       |                       |
|                 | ES      | -0.99                 | -1.55                 |                       |                       |
|                 | p-value | 1.06x10 <sup>-1</sup> | 2.00x10 <sup>-2</sup> |                       |                       |
| <b>Lactate</b>  | % Var   | 20.13                 | 8.26                  | 18.07                 | 20.82                 |
|                 | ±       | 3.54                  | 3.33                  | 3.67                  | 3.39                  |
|                 | ES      | 2.76                  | 1.21                  | 2.41                  | 2.97                  |
|                 | p-value | 7.98x10 <sup>-4</sup> | 5.63x10 <sup>-2</sup> | 1.61x10 <sup>-3</sup> | 7.06x10 <sup>-4</sup> |
| <b>Leu</b>      | % Var   | 41.48                 | 74.41                 | 0                     | 0                     |
|                 | ±       | 9.48                  | 9.06                  |                       |                       |
|                 | ES      | 1.93                  | 3.14                  |                       |                       |
|                 | p-value | 1.41x10 <sup>-2</sup> | 6.74x10 <sup>-4</sup> |                       |                       |
| <b>Lys</b>      | % Var   | 5.50                  | 5.17                  | 0                     | -5.28                 |
|                 | ±       | 1.88                  | 1.03                  |                       | 1.89585967            |
|                 | ES      | 1.52                  | 2.70                  |                       | -1.525629128          |
|                 | p-value | 2.65x10 <sup>-2</sup> | 9.02x10 <sup>-4</sup> |                       | 0.02509619            |
| <b>Met</b>      | % Var   | -95.15                | -95.24                | 0                     | 0                     |
|                 | ±       | 33.01                 | 30.53                 |                       |                       |
|                 | ES      | -2.93                 | -2.76                 |                       |                       |
|                 | p-value | 2.45x10 <sup>-3</sup> | 2.43x10 <sup>-3</sup> |                       |                       |
| <b>Phe</b>      | % Var   | 0                     | 0                     | 0                     | 0                     |
|                 | ±       |                       |                       |                       |                       |
|                 | ES      |                       |                       |                       |                       |
|                 | p-value |                       |                       |                       |                       |
| <b>Pyruvate</b> | % Var   | 0                     | 0                     | 0                     | 0                     |
|                 | ±       |                       |                       |                       |                       |
|                 | ES      |                       |                       |                       |                       |
|                 | p-value |                       |                       |                       |                       |
| <b>Thr</b>      | % Var   | 0                     | 0                     | 0                     | 0                     |
|                 | ±       |                       |                       |                       |                       |
|                 | ES      |                       |                       |                       |                       |
|                 | p-value |                       |                       |                       |                       |
| <b>Tyr</b>      | % Var   | 0                     | 0                     | 0                     | 0                     |
|                 | ±       |                       |                       |                       |                       |
|                 | ES      |                       |                       |                       |                       |
|                 | p-value |                       |                       |                       |                       |
| <b>Val</b>      | % Var   | 18.27                 | 31.61                 | 0                     | 0                     |
|                 | ±       | 6.21                  | 6.39                  |                       |                       |
|                 | ES      | 1.44                  | 2.24                  |                       |                       |
|                 | p-value | 3.78x10 <sup>-2</sup> | 3.24x10 <sup>-3</sup> |                       |                       |



**Table S3.** Metabolite variations in the polar extracts of MDA-MB-231 cells treated with HT or LUT, in relation to untreated controls. The values of % variation are those used to color-code the heatmap shown in Figure 4C.

|                |         | HT 70μM               | HT 140μM              | LUT 15μM              | LUT 30μM              |
|----------------|---------|-----------------------|-----------------------|-----------------------|-----------------------|
| <b>Acetate</b> | % Var   | 9.38                  | 23.80                 | 45.01                 | 47.73                 |
|                | ±       | 4.40                  | 5.92                  | 5.15                  | 4.93                  |
|                | ES      | 1.07                  | 1.91                  | 4.06                  | 4.43                  |
|                | p-value | 7.48x10 <sup>-2</sup> | 5.68x10 <sup>-3</sup> | 7.99x10 <sup>-5</sup> | 3.44x10 <sup>-5</sup> |
| <b>ADP+ATP</b> | % Var   | 0                     | 0                     | 10.92                 | 14.27                 |
|                | ±       |                       |                       | 2.61                  | 3.43                  |
|                | ES      |                       |                       | 2.22                  | 2.27                  |
|                | p-value |                       |                       | 3.75x10 <sup>-3</sup> | 7.11x10 <sup>-3</sup> |
| <b>Ala</b>     | % Var   | 0                     | -4.61                 | -13.55                | -18.68                |
|                | ±       |                       |                       | 4.00                  | 3.85                  |
|                | ES      |                       |                       | -2.06                 | -3.01                 |
|                | p-value |                       |                       | 8.45x10 <sup>-3</sup> | 8.62x10 <sup>-4</sup> |
| <b>Cr</b>      | % Var   | 0                     | -7.25                 | -8.68                 | -10.73                |
|                | ±       |                       | 3.18                  | 3.43                  | 4.49                  |
|                | ES      |                       | -1.26                 | -1.40                 | -1.41                 |
|                | p-value |                       | 4.52x10 <sup>-2</sup> | 2.80x10 <sup>-2</sup> | 3.60x10 <sup>-2</sup> |
| <b>Formate</b> | % Var   | 13.11                 | 25.41                 | 48.52                 | 45.57                 |
|                | ±       | 5.64                  | 6.01                  | 5.86                  | 6.23                  |
|                | ES      | 1.11                  | 2.00                  | 3.61                  | 3.27                  |
|                | p-value | 7.30x10 <sup>-2</sup> | 5.25x10 <sup>-3</sup> | 9.59x10 <sup>-5</sup> | 1.92x10 <sup>-4</sup> |
| <b>Gln</b>     | % Var   | 9.98                  | 10.61                 | 0                     | -12.92                |
|                | ±       | 3.59                  | 3.44                  |                       | 3.78                  |
|                | ES      | 1.43                  | 1.56                  |                       | -1.93                 |
|                | p-value | 2.61x10 <sup>-2</sup> | 1.64x10 <sup>-2</sup> |                       | 6.01x10 <sup>-3</sup> |
| <b>Gly</b>     | % Var   | 3.65                  | -1.92                 | -7.61                 | -22.97                |
|                | ±       |                       |                       | 1.91                  | 2.98                  |
|                | ES      |                       |                       | -2.38                 | -5.11                 |
|                | p-value |                       |                       | 4.61x10 <sup>-3</sup> | 2.87x10 <sup>-4</sup> |
| <b>GPC</b>     | % Var   | 0                     | 8.45                  | 38.17                 | 78.82                 |
|                | ±       |                       | 3.81                  | 4.92                  | 7.07                  |
|                | ES      |                       | 1.14                  | 3.89                  | 4.96                  |
|                | p-value |                       | 6.08x10 <sup>-2</sup> | 7.30x10 <sup>-4</sup> | 6.87x10 <sup>-4</sup> |
| <b>GSH</b>     | % Var   | 13.67                 | 8.31                  | 19.04                 | 16.93                 |
|                | ±       | 4.82                  | 5.20                  | 3.92                  | 5.17                  |
|                | ES      | 1.48                  | 0.82                  | 2.38                  | 1.71                  |
|                | p-value | 2.65x10 <sup>-2</sup> | 1.57x10 <sup>-1</sup> | 1.74x10 <sup>-3</sup> | 1.59x10 <sup>-2</sup> |
| <b>Ile</b>     | % Var   | 4.43                  | 0                     | -16.77                | -11.38                |
|                | ±       |                       |                       | 1.92                  | 2.10                  |
|                | ES      |                       |                       | -4.83                 | -3.01                 |
|                | p-value |                       |                       | 6.40x10 <sup>-5</sup> | 3.97x10 <sup>-4</sup> |

|                   |         | HT 70μM               | HT 140μM              | LUT 15μM              | LUT 30μM              |
|-------------------|---------|-----------------------|-----------------------|-----------------------|-----------------------|
| <b>Lactate</b>    | % Var   | -4.98                 | -15.73                | -36.08                | -34.29                |
|                   | ±       |                       | 4.82                  | 4.75                  | 5.04                  |
|                   | ES      |                       | -1.89                 | -4.69                 | -4.24                 |
|                   | p-value |                       | 6.20x10 <sup>-3</sup> | 4.12x10 <sup>-5</sup> | 3.77x10 <sup>-5</sup> |
| <b>Leu</b>        | % Var   | 3.54                  | 0                     | -8.54                 | -6.26                 |
|                   | ±       |                       |                       | 1.75                  | 1.67                  |
|                   | ES      |                       |                       | -2.66                 | -2.00                 |
|                   | p-value |                       |                       | 9.80x10 <sup>-4</sup> | 5.67x10 <sup>-3</sup> |
| <b>m-Ino</b>      | % Var   | 2.48                  | -3.23                 | -17.11                | -21.30                |
|                   | ±       |                       |                       | 2.63                  | 3.17                  |
|                   | ES      |                       |                       | -4.08                 | -4.38                 |
|                   | p-value |                       |                       | 2.71x10 <sup>-4</sup> | 3.67x10 <sup>-4</sup> |
| <b>NAD+</b>       | % Var   | 0                     | 14.74                 | 28.00                 | 30.11                 |
|                   | ±       |                       | 7.28                  | 7.16                  | 4.53                  |
|                   | ES      |                       | 1.01                  | 2.00                  | 3.10                  |
|                   | p-value |                       | 9.36x10 <sup>-2</sup> | 1.08x10 <sup>-2</sup> | 3.06x10 <sup>-4</sup> |
| <b>Pcho</b>       | % Var   | 10.37                 | 11.15                 | 0                     | -13.06                |
|                   | ±       | 3.81                  | 4.13                  |                       | 5.83                  |
|                   | ES      | 1.36                  | 1.36                  |                       | -1.33                 |
|                   | p-value | 3.29x10 <sup>-2</sup> | 3.02x10 <sup>-2</sup> |                       | 4.34x10 <sup>-2</sup> |
| <b>PCr</b>        | % Var   | 3.31                  | -3.89                 | -4.54                 | -9.94                 |
|                   | ±       |                       |                       |                       | 2.52                  |
|                   | ES      |                       |                       |                       | -2.44                 |
|                   | p-value |                       |                       |                       | 7.63x10 <sup>-3</sup> |
| <b>Phe</b>        | % Var   | 0                     | -4.06                 | -13.59                | -16.15                |
|                   | ±       |                       |                       | 2.95                  | 3.57                  |
|                   | ES      |                       |                       | -2.76                 | -2.81                 |
|                   | p-value |                       |                       | 1.15x10 <sup>-3</sup> | 1.97x10 <sup>-3</sup> |
| <b>Taurine</b>    | % Var   | 6.24                  | 4.73                  | 13.46                 | 20.49                 |
|                   | ±       | 3.69                  |                       | 3.95                  | 4.11                  |
|                   | ES      | 0.97                  |                       | 1.91                  | 2.72                  |
|                   | p-value | 1.56x10 <sup>-1</sup> |                       | 2.25x10 <sup>-2</sup> | 5.96x10 <sup>-3</sup> |
| <b>Tyr</b>        | % Var   | 4.17                  | 0                     | -10.89                | -11.40                |
|                   | ±       |                       |                       | 3.17                  | 2.92                  |
|                   | ES      |                       |                       | -1.95                 | -2.18                 |
|                   | p-value |                       |                       | 5.67x10 <sup>-3</sup> | 3.03x10 <sup>-3</sup> |
| <b>UDP-GlcNAC</b> | % Var   | 0                     | 14.72                 | 28.15                 | 46.04                 |
|                   | ±       |                       | 2.30                  | 3.59                  | 4.59                  |
|                   | ES      |                       | 3.18                  | 4.20                  | 5.04                  |
|                   | p-value |                       | 5.45x10 <sup>-4</sup> | 1.36x10 <sup>-3</sup> | 8.46x10 <sup>-4</sup> |
| <b>Val</b>        | % Var   | 6.22                  | 3.06                  | -15.53                | -6.43                 |
|                   | ±       | 2.42                  |                       | 1.85                  | 1.91                  |
|                   | ES      | 1.43                  |                       | -4.81                 | -1.89                 |
|                   | p-value | 4.00x10 <sup>-2</sup> |                       | 1.02x10 <sup>-5</sup> | 7.00x10 <sup>-3</sup> |

**Table S4.** Metabolite variations in the polar extracts of MCF-7 cells treated with HT or LUT, in relation to untreated controls. The values of % variation are those used to color-code the heatmap shown in Figure 4D.

|                |         | HT 150μM              | HT 300μM              | LUT 7.5μM             | LUT 15μM              |
|----------------|---------|-----------------------|-----------------------|-----------------------|-----------------------|
| <b>ADP+ATP</b> | % Var   | 13.04                 | 17.85                 | 5.44                  | 0                     |
|                | ±       | 5.83                  | 4.39                  | 3.03                  |                       |
|                | ES      | 1.07                  | 1.92                  | 0.95                  |                       |
|                | p-value | 8.03x10 <sup>-2</sup> | 7.36x10 <sup>-3</sup> | 1.15x10 <sup>-1</sup> |                       |
| <b>Ala</b>     | % Var   | 21.10                 | -12.90                | 25.14                 | 21.34                 |
|                | ±       | 4.66                  | 4.93                  | 4.45                  | 4.42                  |
|                | ES      | 2.27                  | -1.63                 | 2.80                  | 2.49                  |
|                | p-value | 3.46x10 <sup>-3</sup> | 2.91x10 <sup>-2</sup> | 1.15x10 <sup>-3</sup> | 3.18x10 <sup>-3</sup> |
| <b>Arg</b>     | % Var   | -21.98                | -48.50                | -7.92                 | -11.58                |
|                | ±       | 1.41                  | 3.10                  | 2.36                  | 2.55                  |
|                | ES      | -9.91                 | -11.00                | -1.81                 | -2.75                 |
|                | p-value | 8.83x10 <sup>-8</sup> | 1.23x10 <sup>-7</sup> | 9.72x10 <sup>-3</sup> | 3.77x10 <sup>-3</sup> |
| <b>Asn</b>     | % Var   | 52.59                 | 42.59                 | 14.81                 | 28.44                 |
|                | ±       | 3.76                  | 2.87                  | 6.88                  | 5.85                  |
|                | ES      | 5.89                  | 7.10                  | 1.03                  | 2.43                  |
|                | p-value | 1.79x10 <sup>-6</sup> | 3.19x10 <sup>-5</sup> | 8.62x10 <sup>-2</sup> | 4.92x10 <sup>-3</sup> |
| <b>Asp</b>     | % Var   | -41.37                | -63.80                | -22.63                | -36.29                |
|                | ±       | 3.36                  | 3.19                  | 3.12                  | 3.50                  |
|                | ES      | -8.63                 | -17.57                | -4.47                 | -7.24                 |
|                | p-value | 6.91x10 <sup>-8</sup> | 1.09x10 <sup>-8</sup> | 1.71x10 <sup>-5</sup> | 2.35x10 <sup>-6</sup> |
| <b>Cr</b>      | % Var   | 22.59                 | 33.00                 | 0                     | 0                     |
|                | ±       | 5.60                  | 6.06                  |                       |                       |
|                | ES      | 1.85                  | 2.36                  |                       |                       |
|                | p-value | 9.03x10 <sup>-3</sup> | 3.02x10 <sup>-3</sup> |                       |                       |
| <b>Formate</b> | % Var   | 21.71                 | 52.41                 | 0                     | 0                     |
|                | ±       | 11.04                 | 12.64                 |                       |                       |
|                | ES      | 0.99                  | 1.72                  |                       |                       |
|                | p-value | 1.16x10 <sup>-1</sup> | 1.09x10 <sup>-2</sup> |                       |                       |
| <b>Gln</b>     | % Var   | 37.66                 | 26.95                 | -6.23                 | -15.47                |
|                | ±       | 11.93                 | 2.88                  | 4.39                  | 5.45                  |
|                | ES      | 1.32                  | 4.81                  | -0.81                 | -1.76                 |
|                | p-value | 4.33x10 <sup>-2</sup> | 2.78x10 <sup>-4</sup> | 1.76x10 <sup>-1</sup> | 1.66x10 <sup>-2</sup> |
| <b>Gly</b>     | % Var   | 134.15                | 138.47                | 0                     | 0                     |
|                | ±       | 17.54                 | 7.41                  |                       |                       |
|                | ES      | 2.24                  | 5.66                  |                       |                       |
|                | p-value | 5.19x10 <sup>-3</sup> | 3.09x10 <sup>-6</sup> |                       |                       |
| <b>GPC</b>     | % Var   | -8.42                 | 7.59                  | -7.95                 | -16.13                |
|                | ±       | 2.92                  | 1.93                  | 2.40                  | 2.08                  |
|                | ES      | -1.60                 | 2.11                  | -1.88                 | -4.83                 |
|                | p-value | 1.57x10 <sup>-2</sup> | 5.17x10 <sup>-3</sup> | 7.17x10 <sup>-3</sup> | 5.25x10 <sup>-5</sup> |

|                |         | HT 150uM              | HT 300uM              | LUT 7.5uM             | LUT 15uM              |
|----------------|---------|-----------------------|-----------------------|-----------------------|-----------------------|
| <b>GSH</b>     | % Var   | -39.93                | -54.17                | 10                    | 11.08                 |
|                | ±       | 3.00                  | 3.53                  | 1.42                  | 2.17                  |
|                | ES      | -8.92                 | -11.36                | 3.79                  | 2.76                  |
|                | p-value | 1.60x10 <sup>-7</sup> | 3.87x10 <sup>-8</sup> | 1.80x10 <sup>-4</sup> | 2.18x10 <sup>-3</sup> |
| <b>His</b>     | % Var   | -9.90                 | -44.00                | -15.16                | -15.84                |
|                | ±       | 4.29                  | 4.47                  | 4.95                  | 4.11                  |
|                | ES      | -1.39                 | -7.86                 | -1.84                 | -2.39                 |
|                | p-value | 4.29x10 <sup>-2</sup> | 1.28x10 <sup>-4</sup> | 9.15x10 <sup>-3</sup> | 5.52x10 <sup>-3</sup> |
| <b>Ile</b>     | % Var   | 15.20                 | 0                     | -13.64                | -11.00                |
|                | ±       | 7.27                  |                       | 4.97                  | 5.26                  |
|                | ES      | 1.00                  |                       | -1.66                 | -1.26                 |
|                | p-value | 9.31x10 <sup>-2</sup> |                       | 1.73x10 <sup>-2</sup> | 5.80x10 <sup>-2</sup> |
| <b>Lactate</b> | % Var   | 44.18                 | 66.72                 | 0                     | 0                     |
|                | ±       | 9.11                  | 6.75                  |                       |                       |
|                | ES      | 2.07                  | 3.97                  |                       |                       |
|                | p-value | 4.00x10 <sup>-2</sup> | 5.03x10 <sup>-5</sup> |                       |                       |
| <b>Leu</b>     | % Var   | 36.22                 | 43.68                 | -11.65                | -5.82                 |
|                | ±       | 1.24                  | 3.44                  | 2.45                  | 2.01                  |
|                | ES      | 12.79                 | 5.17                  | -2.59                 | -1.70                 |
|                | p-value | 7.18x10 <sup>-9</sup> | 1.01x10 <sup>-4</sup> | 2.00x10 <sup>-3</sup> | 2.73x10 <sup>-2</sup> |
| <b>Lys</b>     | % Var   | -17.17                | -36.18                | 0                     | 0                     |
|                | ±       | 5.09                  | 5.62                  |                       |                       |
|                | ES      | -2.19                 | -4.75                 |                       |                       |
|                | p-value | 1.06x10 <sup>-2</sup> | 3.56x10 <sup>-4</sup> |                       |                       |
| <b>m-Ino</b>   | % Var   | -34.03                | -43.24                | -17.12                | -17.57                |
|                | ±       | 7.59                  | 8.07                  | 7.99                  | 7.68                  |
|                | ES      | -3.28                 | -4.18                 | -1.33                 | -1.43                 |
|                | p-value | 2.56x10 <sup>-3</sup> | 8.67x10 <sup>-4</sup> | 4.65x10 <sup>-2</sup> | 4.03x10 <sup>-2</sup> |
| <b>NAD+</b>    | % Var   | 12.19                 | 0                     | 15.42                 | 8.72                  |
|                | ±       | 3.11                  |                       | 3.07                  | 2.01                  |
|                | ES      | 1.89                  |                       | 2.37                  | 2.37                  |
|                | p-value | 8.88x10 <sup>-3</sup> |                       | 2.87x10 <sup>-3</sup> | 3.81x10 <sup>-3</sup> |
| <b>Pcho</b>    | % Var   | 0                     | 48.66                 | -21.77                | 0                     |
|                | ±       |                       | 4.68                  | 1.95                  |                       |
|                | ES      |                       | 4.15                  | -7.09                 |                       |
|                | p-value |                       | 2.68x10 <sup>-4</sup> | 9.93x10 <sup>-7</sup> |                       |
| <b>PCr</b>     | % Var   | 0                     | 0                     | 9.50                  | 5.30                  |
|                | ±       |                       |                       | 1.73                  | 2.31                  |
|                | ES      |                       |                       | 3.01                  | 1.28                  |
|                | p-value |                       |                       | 1.29x10 <sup>-3</sup> | 5.67x10 <sup>-2</sup> |
| <b>Phe</b>     | % Var   | -6.71                 | -30.93                | -16.47                | -17.91                |
|                | ±       | 4.42                  | 4.31                  | 4.34                  | 4.21                  |
|                | ES      | -0.90                 | -5.26                 | -2.44                 | -2.67                 |
|                | p-value | 1.57x10 <sup>-1</sup> | 7.83x10 <sup>-4</sup> | 6.04x10 <sup>-3</sup> | 4.62x10 <sup>-3</sup> |

|                 |         | HT 150uM              | HT 300uM              | LUT 7.5uM             | LUT 15uM              |
|-----------------|---------|-----------------------|-----------------------|-----------------------|-----------------------|
| <b>Pro</b>      | % Var   | 29.95                 | 20.41                 | 14.05                 | 28.24                 |
|                 | ±       | 5.21                  | 1.93                  | 2.36                  | 1.47                  |
|                 | ES      | 2.50                  | 5.21                  | 2.94                  | 9.60                  |
|                 | p-value | $3.10 \times 10^{-3}$ | $5.69 \times 10^{-6}$ | $4.18 \times 10^{-4}$ | $3.17 \times 10^{-6}$ |
| <b>PyroGlu</b>  | % Var   | 38.76                 | 68.33                 | 0                     | 0                     |
|                 | ±       | 7.00                  | 5.68                  |                       |                       |
|                 | ES      | 2.60                  | 5.12                  |                       |                       |
|                 | p-value | $2.19 \times 10^{-3}$ | $1.19 \times 10^{-4}$ |                       |                       |
| <b>Pyruvate</b> | % Var   | 23.61                 | 12.50                 | 0                     | 0                     |
|                 | ±       | 4.36                  | 3.73                  |                       |                       |
|                 | ES      | 2.59                  | 1.77                  |                       |                       |
|                 | p-value | $9.91 \times 10^{-4}$ | $1.42 \times 10^{-2}$ |                       |                       |
| <b>Taurine</b>  | % Var   | 18.81                 | 36.18                 | 6.00                  | 8.49                  |
|                 | ±       | 2.21                  | 1.96                  | 1.72                  | 1.59                  |
|                 | ES      | 4.08                  | 8.19                  | 1.89                  | 2.92                  |
|                 | p-value | $4.58 \times 10^{-5}$ | $1.61 \times 10^{-7}$ | $8.75 \times 10^{-3}$ | $1.19 \times 10^{-3}$ |
| <b>Thr</b>      | % Var   | 0                     | -13.67                | 9.58                  | 11.40                 |
|                 | ±       |                       | 4.40                  | 4.81                  | 5.35                  |
|                 | ES      |                       | -1.88                 | 1.02                  | 1.15                  |
|                 | p-value |                       | $9.54 \times 10^{-3}$ | $9.11 \times 10^{-2}$ | $8.41 \times 10^{-2}$ |
| <b>Trp</b>      | % Var   | 0                     | -36.41                | -13.59                | -17.50                |
|                 | ±       |                       | 5.20                  | 5.57                  | 5.20                  |
|                 | ES      |                       | -5.28                 | -1.48                 | -2.11                 |
|                 | p-value |                       | $5.33 \times 10^{-4}$ | $2.97 \times 10^{-2}$ | $8.49 \times 10^{-3}$ |
| <b>Tyr</b>      | % Var   | -12.77                | -28.66                | 0                     | 0                     |
|                 | ±       | 8.92                  | 10.20                 |                       |                       |
|                 | ES      | -0.92                 | -1.95                 |                       |                       |
|                 | p-value | $1.83 \times 10^{-1}$ | $1.66 \times 10^{-2}$ |                       |                       |
| <b>Val</b>      | % Var   | 11.60                 | 0                     | -14.25                | -14.12                |
|                 | ±       | 6.70                  |                       | 3.99                  | 3.98                  |
|                 | ES      | 0.84                  |                       | -2.21                 | -2.18                 |
|                 | p-value | $1.47 \times 10^{-1}$ |                       | $5.76 \times 10^{-3}$ | $6.47 \times 10^{-3}$ |
